# Supplementary material for: The mortality benefit of carvedilol versus bisoprolol in patients with heart failure with reduced ejection fraction
Source: PubMed Central journal article supplement — Korean J Intern Med. 2018 Oct 16;34(5):1030–9. doi: 10.3904/kjim.2018.009 (PMC6718755; doi:10.3904/kjim.2018.009), 2018-10-16
Supplement: kjim-2018-009-suppl1.pdf [file kjim-2018-009-suppl1.pdf]

**Supplementary Table 1. Baseline clinical, laboratory characteristics, treatment strategy, and outcomes on admission according to prescription of  $\beta$ -blocker**

| Characteristic                     | BB (n = 1,707)   | No BB (n = 1,309) | p value              |
|------------------------------------|------------------|-------------------|----------------------|
| Age, yr                            | 64.96 $\pm$ 14.7 | 67.34 $\pm$ 14.9  | < 0.001 <sup>a</sup> |
| Male sex                           | 1,036 (60.7)     | 809 (61.8)        | 0.560                |
| Current smoker                     | 405 (23.7)       | 248 (18.9)        | 0.002 <sup>a</sup>   |
| Body mass index, kg/m <sup>2</sup> | 23.5 $\pm$ 3.9   | 22.8 $\pm$ 3.8    | < 0.001 <sup>a</sup> |
| Hypertension                       | 958 (56.1)       | 703 (53.7)        | 0.199                |
| Diabetes mellitus                  | 644 (37.7)       | 466 (35.6)        | 0.245                |
| Chronic kidney disease             | 214 (12.5)       | 212 (16.2)        | 0.005 <sup>a</sup>   |
| Pulmonary disease                  | 137 (8.0)        | 174 (13.3)        | < 0.001 <sup>a</sup> |
| Prior HF admission                 | 483 (28.3)       | 513 (39.2)        | < 0.001 <sup>a</sup> |
| <i>De novo</i> HF                  | 977 (57.2)       | 576 (44.0)        | < 0.001 <sup>a</sup> |
| ICMP                               | 696 (40.8)       | 551 (42.1)        | 0.489                |
| Atrial fibrillation                | 507 (29.7)       | 367 (28.0)        | 0.338                |
| NYHA $\geq$ 3                      | 1,461 (85.6)     | 1,136 (86.8)      | 0.375                |
| SBP, mmHg                          | 131.5 $\pm$ 29.1 | 125.2 $\pm$ 28.2  | < 0.001 <sup>a</sup> |
| DBP, mmHg                          | 81.9 $\pm$ 18.9  | 76.9 $\pm$ 17.6   | < 0.001 <sup>a</sup> |
| Pulse rate, beats/min              | 95.7 $\pm$ 24.6  | 95.5 $\pm$ 25.6   | 0.809                |
| LVEF, %                            | 26.7 $\pm$ 7.4   | 26.8 $\pm$ 7.5    | 0.758                |
| Sodium, mmol/L                     | 137.9 $\pm$ 4.4  | 137.1 $\pm$ 4.9   | < 0.001 <sup>a</sup> |
| Creatinine, mg/dL                  | 1.47 $\pm$ 1.4   | 1.52 $\pm$ 1.5    | 0.333                |
| Hemoglobin, g/dL                   | 12.9 $\pm$ 2.3   | 12.6 $\pm$ 2.3    | < 0.001 <sup>a</sup> |
| AAs at discharge                   | 970 (56.8)       | 610 (46.6)        | < 0.001 <sup>a</sup> |
| RASB at discharge                  | 1,408 (82.5)     | 885 (67.6)        | < 0.001 <sup>a</sup> |
| Loop diuretics                     | 1,615 (94.6)     | 1,232 (94.1)      | 0.615                |
| Intravenous inotropes              | 470 (27.5)       | 562 (42.9)        | < 0.001 <sup>a</sup> |
| Transfusion                        | 238 (13.9)       | 280 (21.4)        | < 0.001 <sup>a</sup> |
| Mechanical ventilation             | 186 (10.9)       | 215 (16.4)        | < 0.001 <sup>a</sup> |
| Renal replacement therapy          | 99 (5.8)         | 89 (6.8)          | 0.294                |
| Assist device <sup>b</sup>         | 89 (5.2)         | 83 (6.3)          | 0.214                |
| ICU admission                      | 786 (46.0)       | 671 (51.3)        | 0.005 <sup>a</sup>   |
| Length of stay, day                | 12.1 $\pm$ 13.8  | 14.8 $\pm$ 18.4   | < 0.001 <sup>a</sup> |
| SBP at discharge, mmHg             | 113.3 $\pm$ 16.9 | 111.9 $\pm$ 16.9  | 0.025 <sup>a</sup>   |

Values are presented as mean  $\pm$  SD or number (%).

BB,  $\beta$ -blocker; HF, heart failure; ICMP, ischemic cardiomyopathy; NYHA, New York Heart Association; SBP, systolic blood pressure; DBP, diastolic blood pressure; LVEF, left ventricular ejection fraction; AA, aldosterone antagonist; RASB, renin angiotensin system blocker; ICU, intensive care unit.

<sup>a</sup>Statistically significance.

<sup>b</sup>Assist devices included intra-aortic balloon pumps, left ventricular assist devices, extracorporeal membrane oxygenation, and cardiac resynchronization therapy.
