# Supplementary material for: The mortality benefit of carvedilol versus bisoprolol in patients with heart failure with reduced ejection fraction
Source: PubMed Central journal article supplement — Korean J Intern Med. 2018 Oct 16;34(5):1030–9. doi: 10.3904/kjim.2018.009 (PMC6718755; doi:10.3904/kjim.2018.009), 2018-10-16
Supplement: kjim-2018-009-suppl2.pdf [file kjim-2018-009-suppl2.pdf]

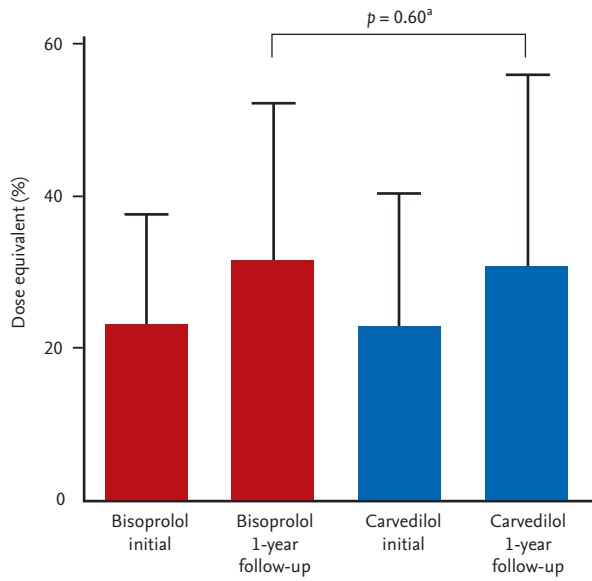

**Supplementary Figure 1.** Initial and 1-year follow-up  $\beta$ -blocker dose equivalent according to carvedilol and bisoprolol. Orange bars denotes bisoprolol and blue bars denotes carvedilol. <sup>a</sup> $p$  value for comparison between 1-year follow-up dose equivalent between bisoprolol and carvedilol.
